# Supplementary material for: The Impact of Vegetable Fibres on the Shrinkage and Mechanical Properties of Cob Materials
Source: MDPI journal article supplement (doi:10.3390/ma17030736), 2024-02-03
Supplement: s1 [file s1]

# The Impact of Vegetable Fibers on the Shrinkage and Mechanical Properties of Cob Materials

Aguerata Kabore \* and Claudiane M. Ouellet-Plamondon

Department of Construction Engineering, Ecole de Technologie Supérieure, 1100 Notre-Dame Street, Montreal, QC H3C 1K3, Canada; claudiane.ouellet-plamondon@etsmtl.ca

\* Correspondence: aguerata.kabore.1@ens.etsmtl.ca

## SUPPLEMENTARY INFORMATION

---

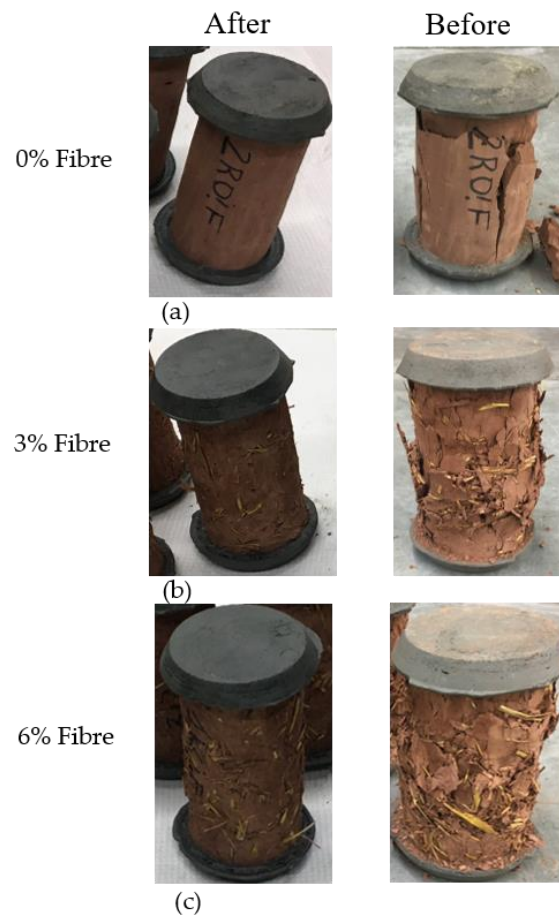

**Figure S1.** The condition of the samples after and before compression testing.

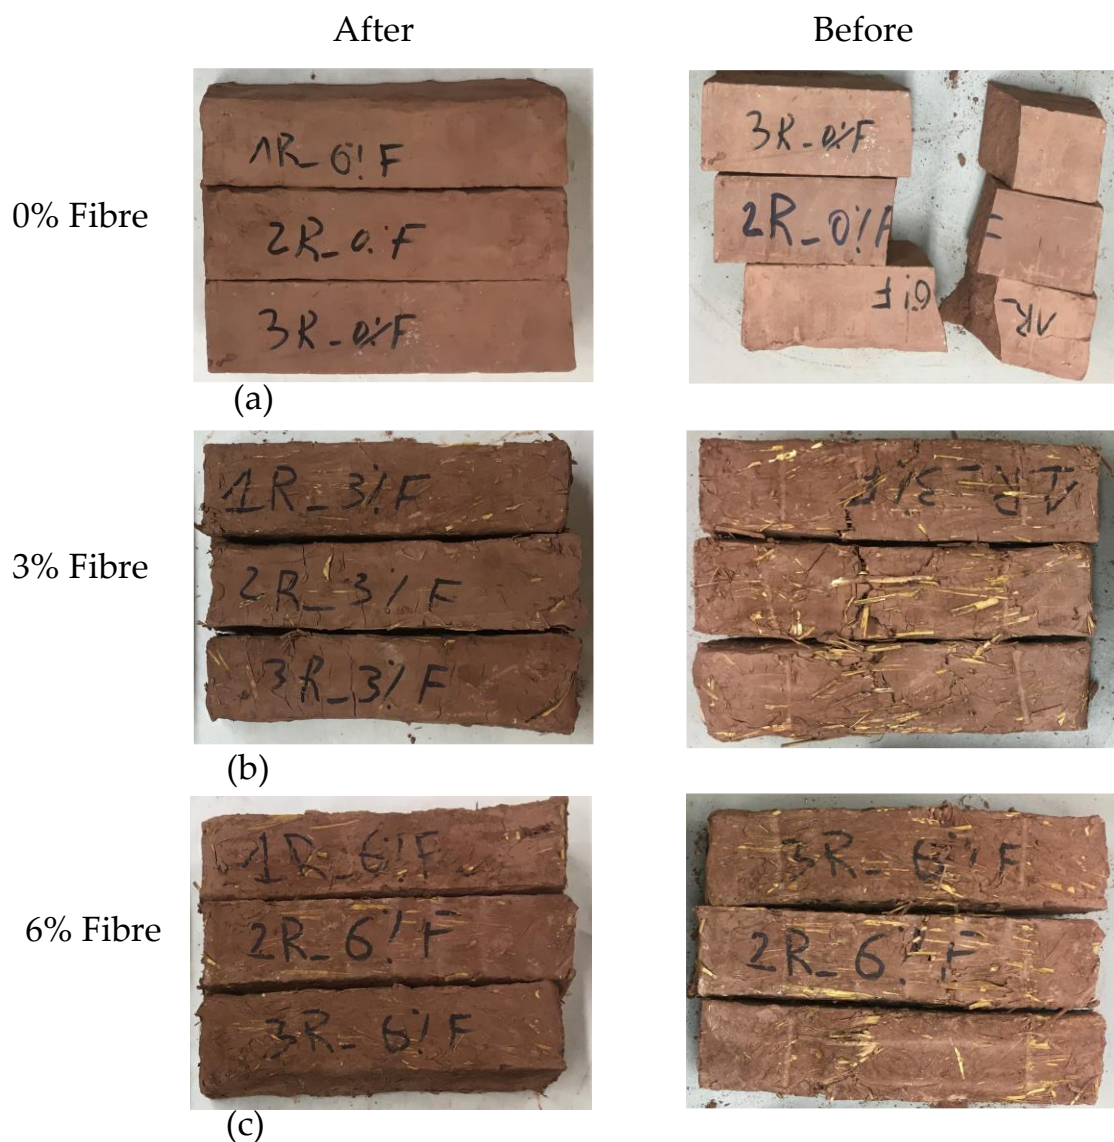

**Figure S2.** Condition of the samples after and before flexural testing.

#### ANOVA and t-TEST

**Table S1.** Influence fibres on compressive strength.

ANOVA - Significant difference observed.

| Time (days) | Groups (fibre) | Count | Average | Stand. dev. | Variance | P-value         |
|-------------|----------------|-------|---------|-------------|----------|-----------------|
| 28          | 0              | 6     | 1.72    | 0.09        | 0.06     | <b>5.03E-11</b> |
|             | 3              | 6     | 2.13    | 0.09        | 0.04     |                 |
|             | 6              | 6     | 4.59    | 0.03        | 0.16     |                 |
| 120         | 0              | 6     | 1.40    | 0.19        | 0.023    | <b>8.61E-10</b> |
|             | 3              | 6     | 2.15    | 0.17        | 0.058    |                 |
|             | 6              | 6     | 3.91    | 0.19        | 0.182    |                 |

**Table S2.** Effect of time on mechanical properties.

t-TEST- Significant difference observed.

|              | Compressive strength |       | Flexural strength |       |
|--------------|----------------------|-------|-------------------|-------|
| Clay         | Red                  | Beige | Red               | Beige |
| Mean         | 2.81                 | 2.49  | 0.83              | 1.25  |
| Variance     | 1.77                 | 1.25  | 0.08              | 0.05  |
| Observations | 18                   | 18    | 18                | 18    |
| P-value      | <b>0.008</b>         |       | <b>8.62E-05</b>   |       |

**Table S3.** Influence fibres on flexural strength.

ANOVA A- Significant difference observed.

| Time (days) | Groups (fibre) | Count | Average | Stand. dev. | Variance | P-value      |
|-------------|----------------|-------|---------|-------------|----------|--------------|
| 28          | 0              | 6     | 1.10    | 0.23        | 0.08     | <b>0.009</b> |
|             | 3              | 6     | 0.71    | 0.21        | 0.06     |              |
|             | 6              | 6     | 0.67    | 0.10        | 0.02     |              |

ANOVA B- Non-significant difference observed.

| Time (days) | Groups (fibre) | Count | Average | Stand. dev. | Variance | P-value     |
|-------------|----------------|-------|---------|-------------|----------|-------------|
| 120         | 0              | 6     | 1.16    | 0.17        | 0.06     | <b>0.17</b> |
|             | 3              | 6     | 1.21    | 0.12        | 0.02     |             |
|             | 6              | 6     | 1.39    | 0.14        | 0.05     |             |
